# Supplementary material for: Efficient free radical generation against cancer cells by low-dose X-ray irradiation with a functional SPC delivery nanosystem
Source: Royal Society of Chemistry journal article supplement (doi:10.1039/c6tb00734a), 2016-01-01
Supplement: c6tb00734a1.pdf [file c6tb00734a1.pdf]

### **Fluorescence labeling of SPC@HMSNs-PAA with FITC**

FITC-APTES was prepared by the reaction between FITC (15mg) and APTES (40 $\mu$ L) in methanol (6mL) for 24 h under dark conditions. Then 50mg SPC@HMSNs-PAA were dispersed into the FITC-APTES solution and stirred in the dark for 24h. The FITC labeled SPC@HMSNs-PAA-FITC were collected by centrifugation, washed with methanol, and dried in vacuum.

### **Fluorescence Microscopy Observation of Intracellular Uptake of SPC@HMSNs-PAA**

ZR-75-30 cells ( $10^5$  per dish) were seeded in petri dishes and cultured for 12h at 37°C. After incubation with SPC@HMSNs-PAA-FITC (20  $\mu$ g/mL) for 4 h, the medium was discarded and the cells were washed twice with PBS to remove the residual nanoparticles. Then 0.5mL of DAPI in methanol (10%) was added and incubated for 15 min to stain the nuclei and fix the cells. After incubation, the cells were washed twice with PBS to remove excessive DAPI. The images were obtained using an inverted fluorescence microscope (Olympus IX71, Japan).

### **Supplementary Figures**

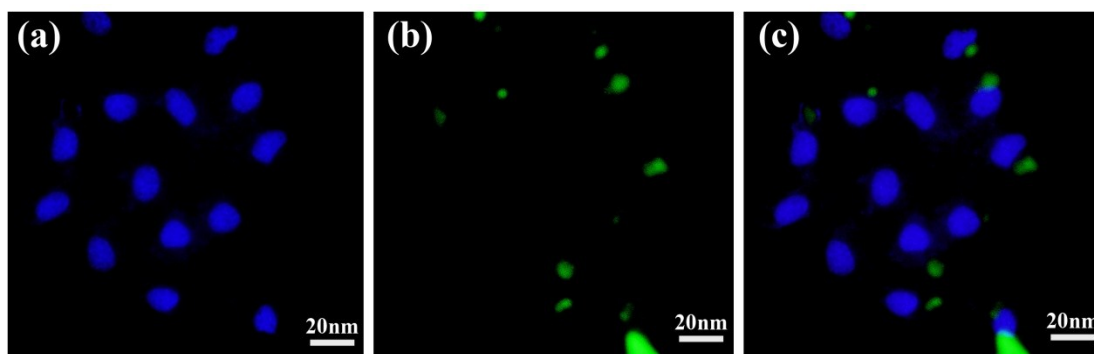

Figure S 1 Cellular uptake of FITC-labeled SPC@HMSNs-PAA by ZR-75-30 cells. (a) Blue fluorescence image of cell nuclei stained with DAPI, (b) Green fluorescence image of SPC@HMSNs-PAA-FITC in cells, (c) Merged fluorescence image.

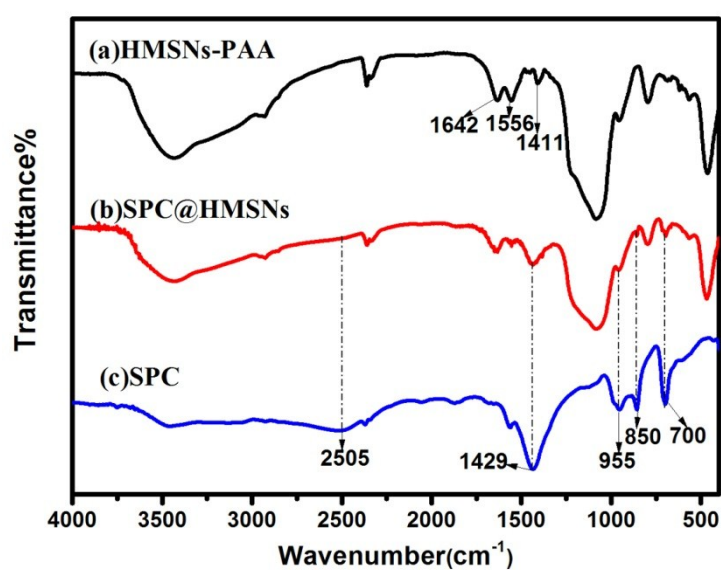

Figure S 2 FTIR spectra of (a)HMSNs-PAA, (b)SPC@HMSNs and (c)SPC. The IR spectrum of SPC@HMSNs was almost coincident with that of SPC demonstrating the presence of SPC. In HMSNs-PAA, new peak at  $1642\text{ cm}^{-1}$  was attributed to the carbonyl group.

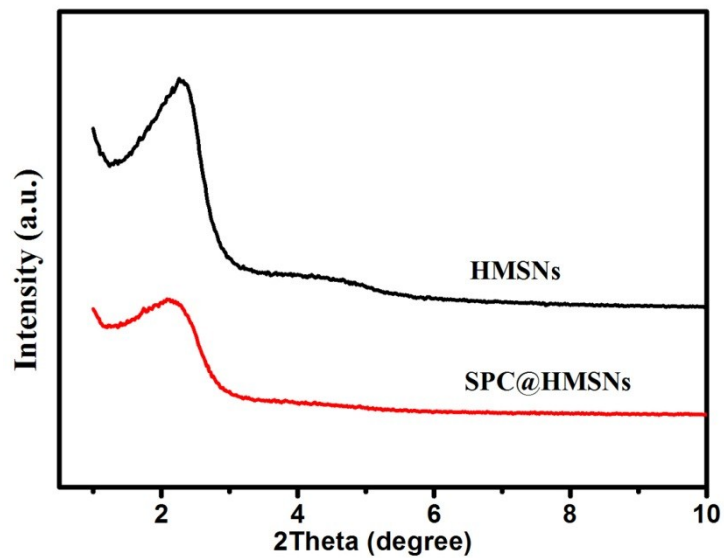

Figure S 3 Low-angle XRD patterns of HMSNs and SPC@HMSNs. After loading of SPC, the intensity of the diffraction peak at  $2\theta = \text{ca. } 2.27$  decreased.

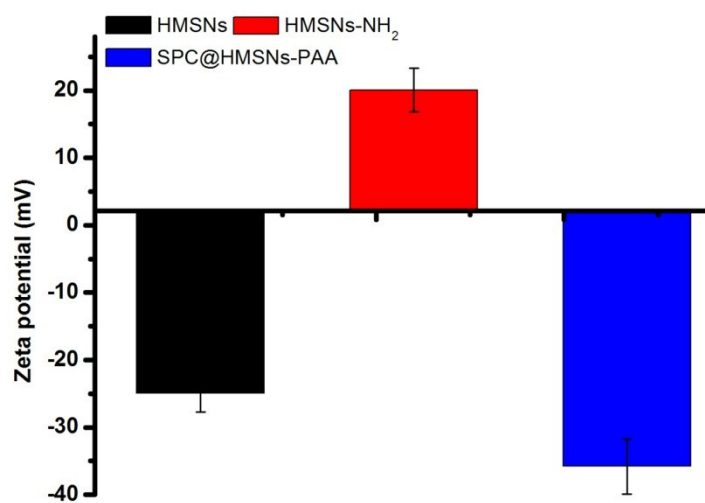

Figure S 4 Zeta potential of HMSNs, HMSNs-NH<sub>2</sub> and SPC@HMSNs-PAA measured in deionized water.
